# Supplementary material for: Effect of different doses of inhaled ciclesonide on lung function, clinical signs related to airflow limitation and serum cortisol levels in horses with experimentally induced mild to severe airway obstruction
Source: PubMed Central journal article supplement — Equine Vet J. 2019 Apr 5;51(6):779–86. doi: 10.1111/evj.13093 (PMC7379559; doi:10.1111/evj.13093), 2019-04-05
Supplement: EVJ-51-779-s002.pdf [file EVJ-51-779-s002.pdf]

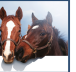

**A**

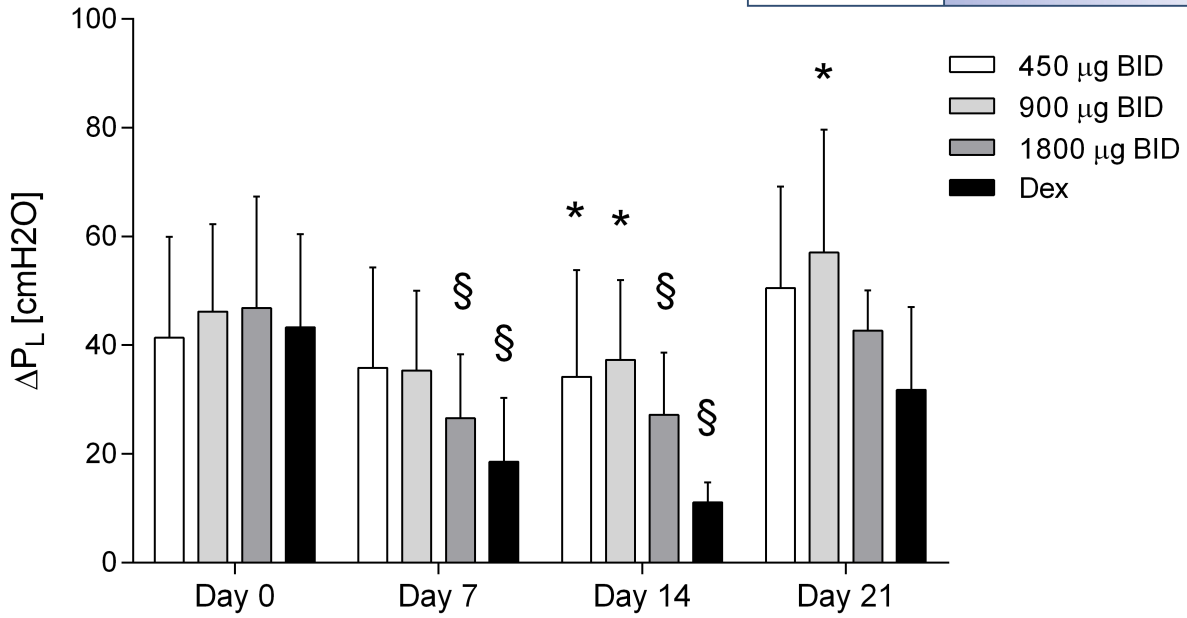

**B**

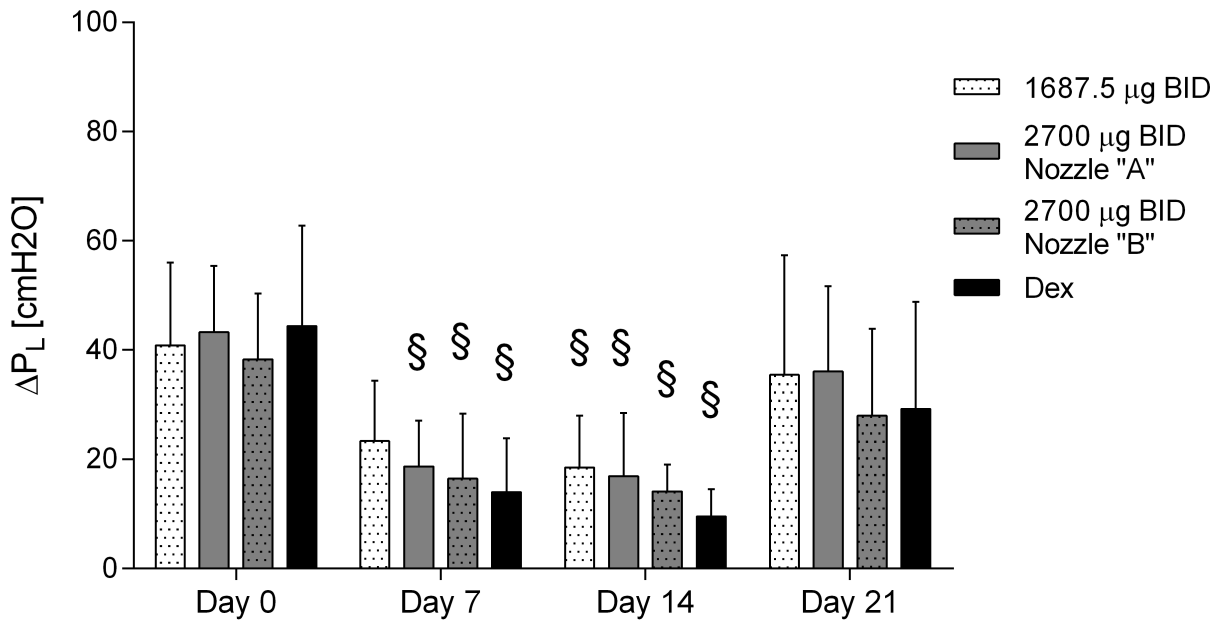

**C**

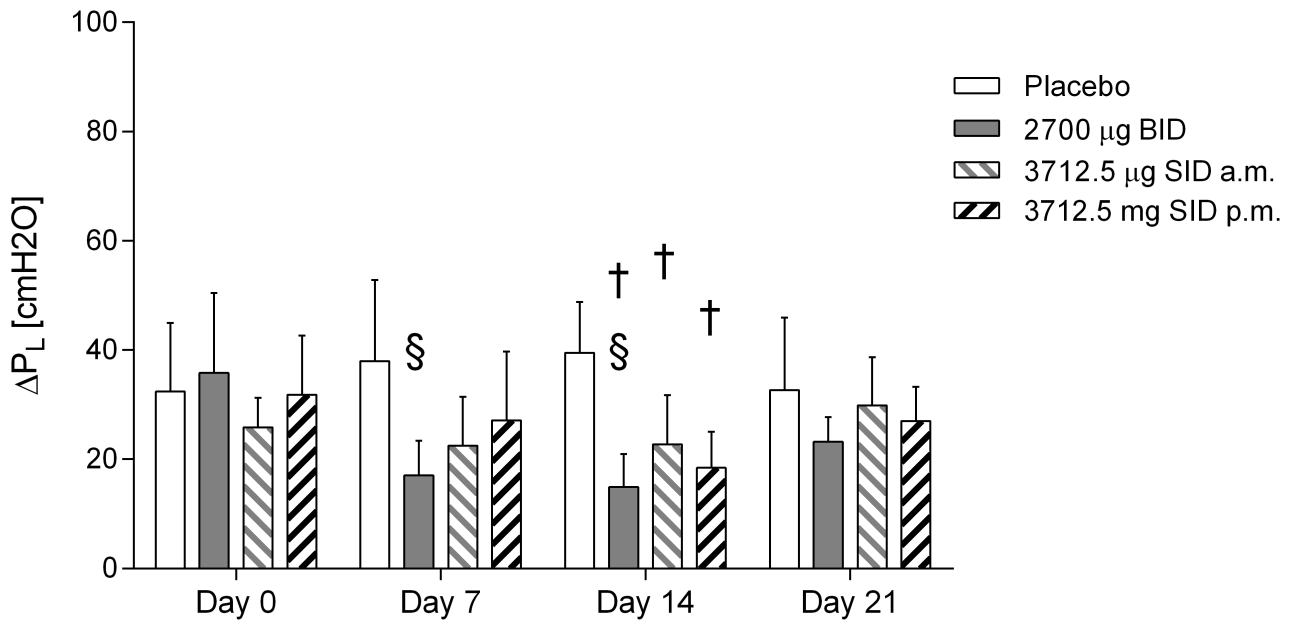

**Supplementary Item 2:** Data of transpulmonary pressure ( $\Delta PL$ ) obtained during the cycles of treatment of the 3 studies. A) Study I; B) study II; C) study III. § = Significantly different from Day 0 for the same treatment ( $p \leq 0.003$ ); \* = significantly different from dexamethasone at the same time point ( $p < 0.0001$ ); † = significantly different from placebo at the same time point ( $p \leq 0.0004$ ).
