# Supplementary material for: Effect of different doses of inhaled ciclesonide on lung function, clinical signs related to airflow limitation and serum cortisol levels in horses with experimentally induced mild to severe airway obstruction
Source: PubMed Central journal article supplement — Equine Vet J. 2019 Apr 5;51(6):779–86. doi: 10.1111/evj.13093 (PMC7379559; doi:10.1111/evj.13093), 2019-04-05

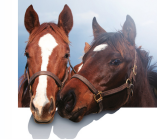

**Supplementary Item 3:** Results of bronchoreversibility tests of studies I (panels A-C) and III (panels D-F).  $\Delta P_L$  = transpulmonary pressure swing;  $R_L$  = pulmonary resistance;  $E_L$  = pulmonary elastance.

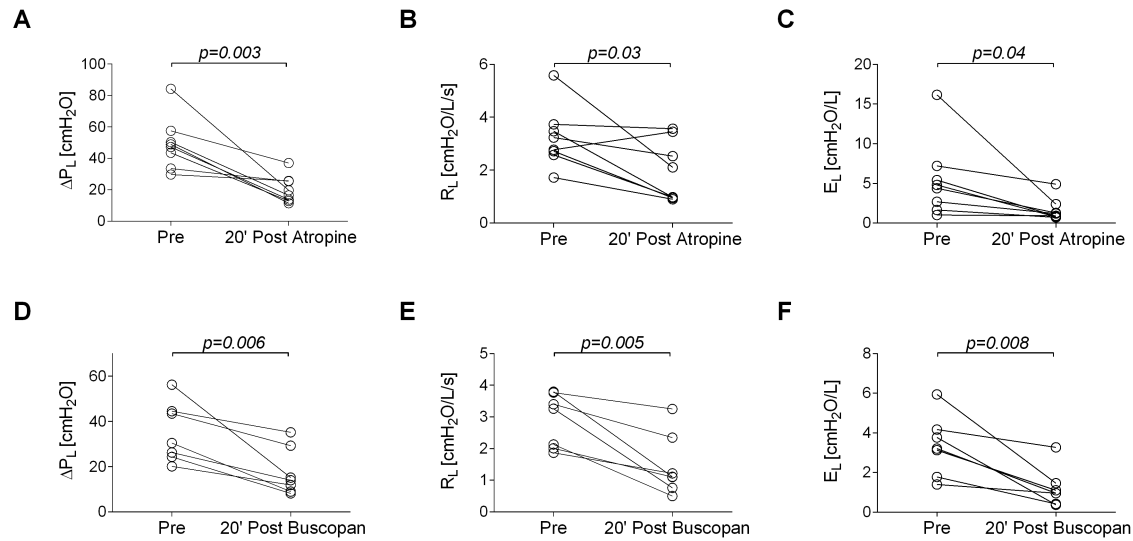

Supplement: EVJ-51-779-s003.pdf [file EVJ-51-779-s003.pdf]
